# Supplementary material for: Anchoring magnetic ZIF-67 on Ti3C2Tx MXene to form composite films with high electromagnetic interference shielding performance
Source: Royal Society of Chemistry journal article supplement (doi:10.1039/d3tc01934a), 2023-01-01
Supplement: d3tc01934a2.pdf [file d3tc01934a2.pdf]

## Supporting Information

### **Anchoring Magnetic ZIF-67 on $Ti_3C_2T_x$ MXene to Form Composite Films with High Electromagnetic Interference Shielding Performance**

Zhenping Ma<sup>a</sup>, Lei Zhang<sup>a</sup>, Xianzhen Wang<sup>a</sup>, Guang Xiao<sup>b</sup>, Yongbao Feng<sup>a\*</sup>, Wei Wang<sup>a</sup>, Konghu Tian<sup>c</sup>, Dewei Liang<sup>d</sup>, Yagang Yao<sup>b</sup>, Qiulong Li<sup>a\*</sup>

a. College of Materials Science and Engineering, Nanjing Tech University, Nanjing 211816, China

b. National Laboratory of Solid State Microstructures, College of Engineering and Applied Sciences, Jiangsu Key Laboratory of Artificial Functional Materials, and Collaborative Innovation Center of Advanced Microstructures, Nanjing University, Nanjing 210093, China

c. Analytical and Testing Center, Anhui University of Science and Technology, Huainan 232001, China

d. School of Energy Materials and Chemical Engineering, Hefei University, Hefei, 230601, China

[\*] Corresponding author: fengyongbao@163.com (Y. B. Feng)

qlli@njtech.edu.cn (Q. L. Li)

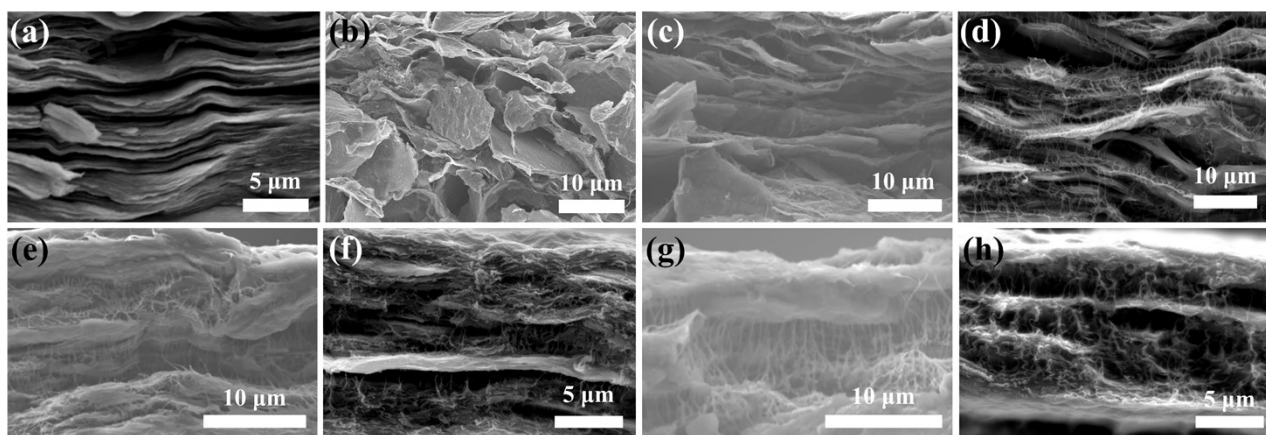

**Figure S1.** Cross-section SEM images of pure MXene film (a), MXene@ZIF-67/MWCNTs composite films (b-g) and pure MWCNTs film (h).

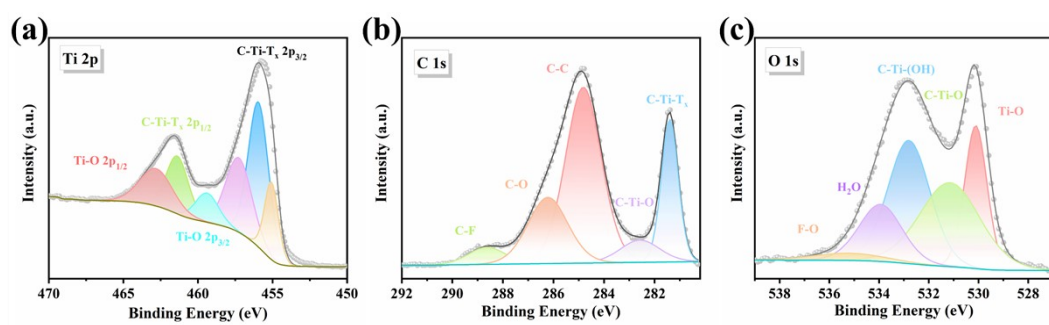

**Figure S2.** High-resolution XPS of Ti 2p (a), C 1s (b), and O 1s (c) spectra for MXene.

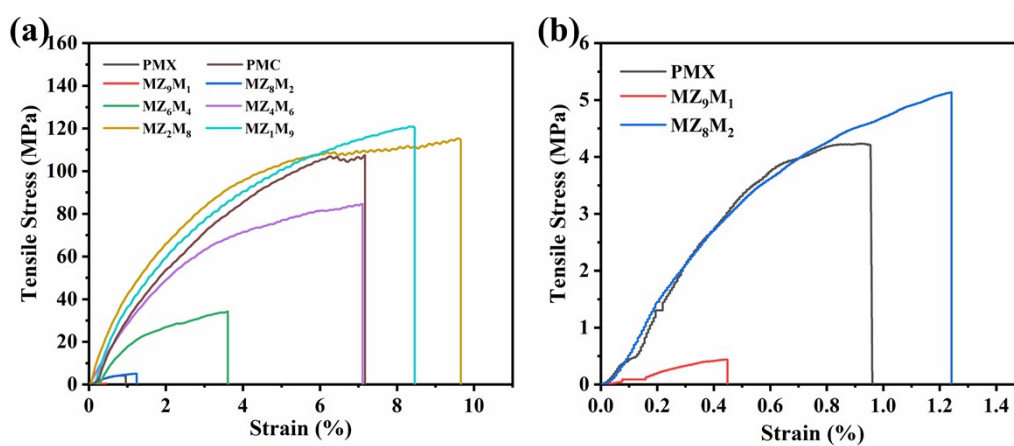

**Figure S3.** Mechanical properties of our as-prepared films.
